# Supplementary material for: Modulating the crystal phase of Zr-based solid acid catalysts to boost the synthesis of 9,9-bis(4-hydroxyphenyl)fluorene
Source: Royal Society of Chemistry journal article supplement (doi:10.1039/d4re00457d), 2024-11-22
Supplement: d4re00457d1.pdf [file d4re00457d1.pdf]

## Supplementary Information

# Modulating crystal phase of Zr-based solid acid catalyst to boost synthesis of 9, 9-bis(4-hydroxyphenyl) fluorene

Jingjie Li <sup>a</sup>, Lin Wang <sup>a</sup>, Yanfeng Pu <sup>a,\*</sup>, Yong Liu <sup>a</sup>, Xiyang Li <sup>a</sup>, Renren Sun <sup>a</sup>, Yahui Xiao <sup>a,\*</sup>.

<sup>a</sup> *School of Energy Science and Technology, Henan University, Zhengzhou 450046, P. R. China*

\* Corresponding authors at: School of Energy Science and Technology, Henan University, Zhengzhou 450046, P. R. China.

E-mail addresses: puyf@henu.edu.cn (Y. Pu), yahuixiao1987@163.com (Y. Xiao).

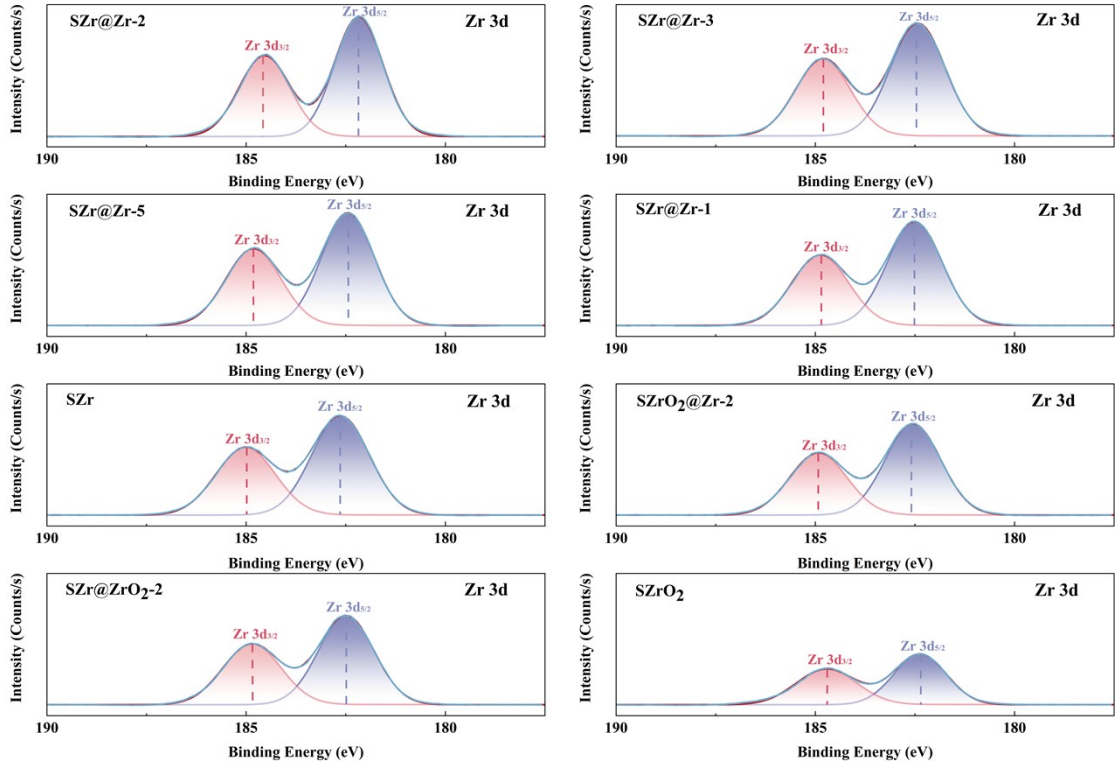

Fig. S1. Zr 3d XPS spectra of catalysts.

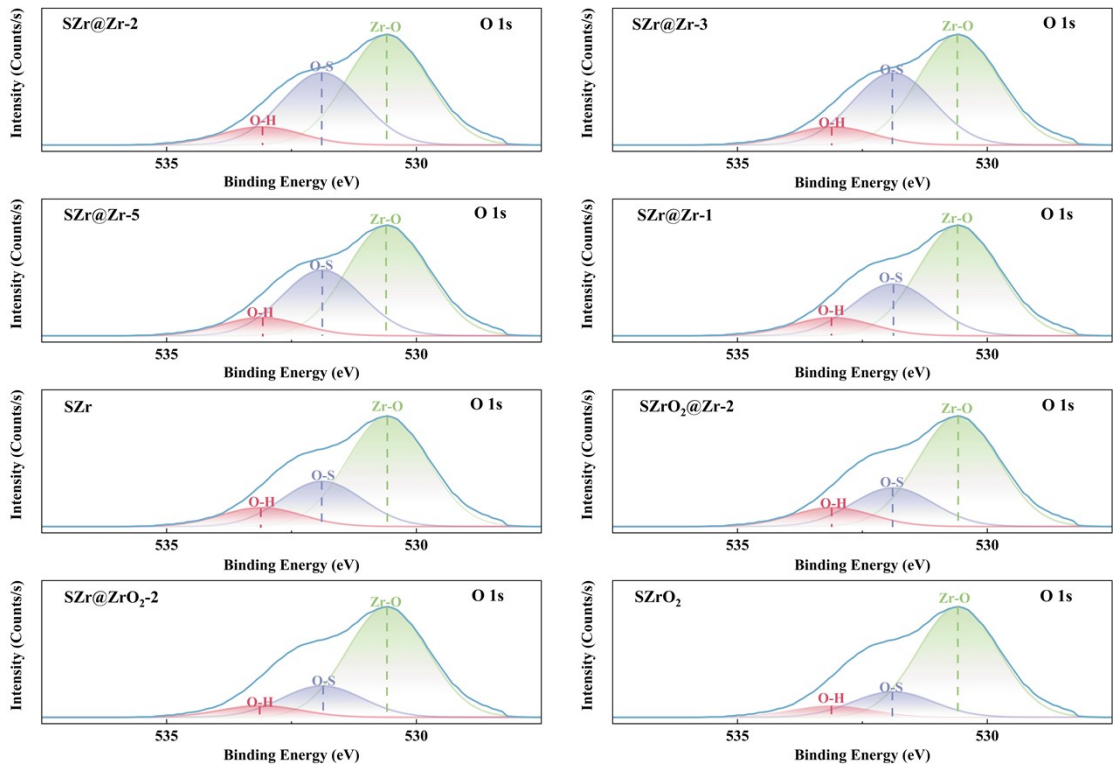

Fig. S2. O 1s XPS spectra of catalysts.

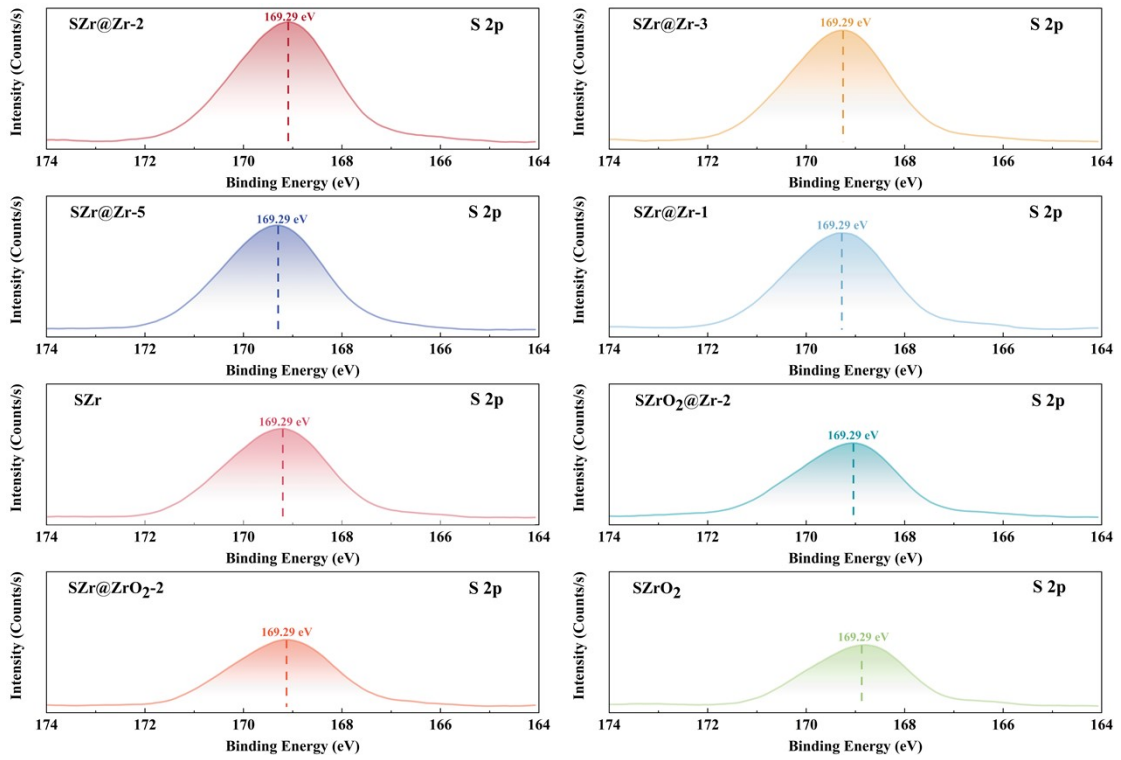

Fig. S3. S 2p XPS spectra of catalysts.

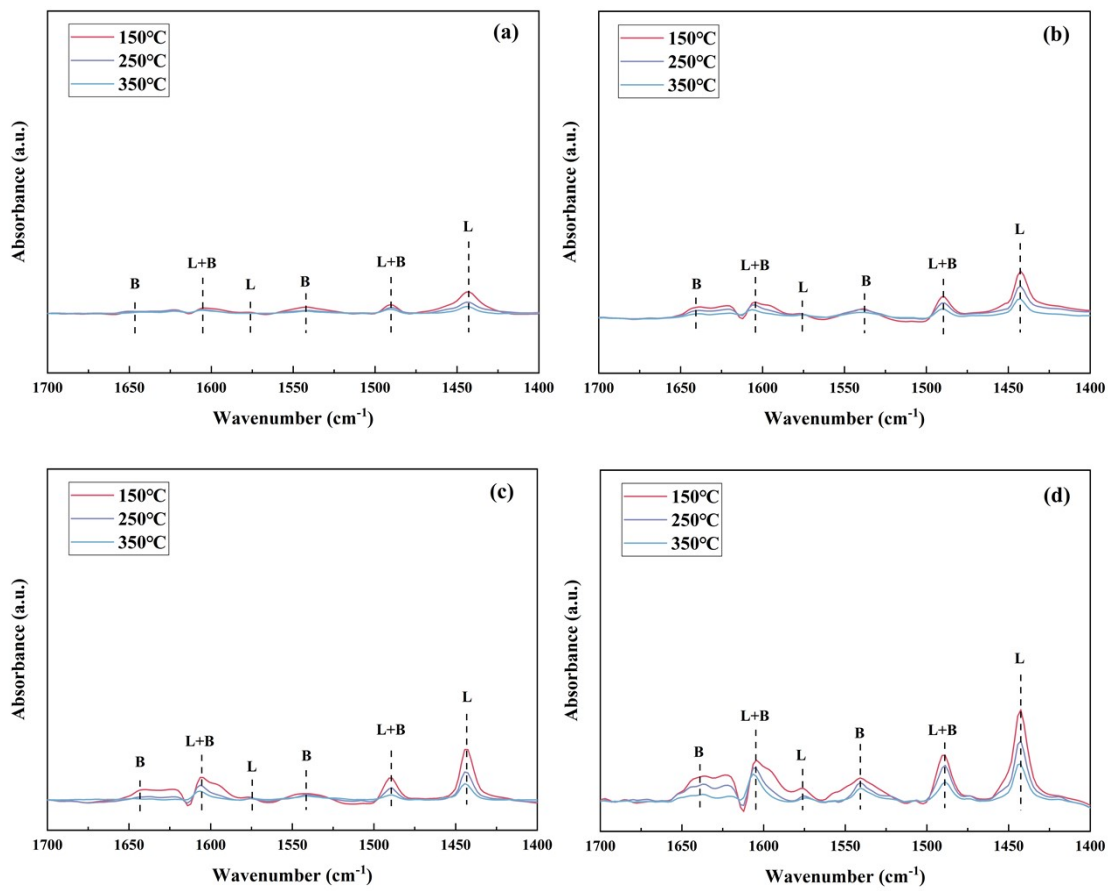

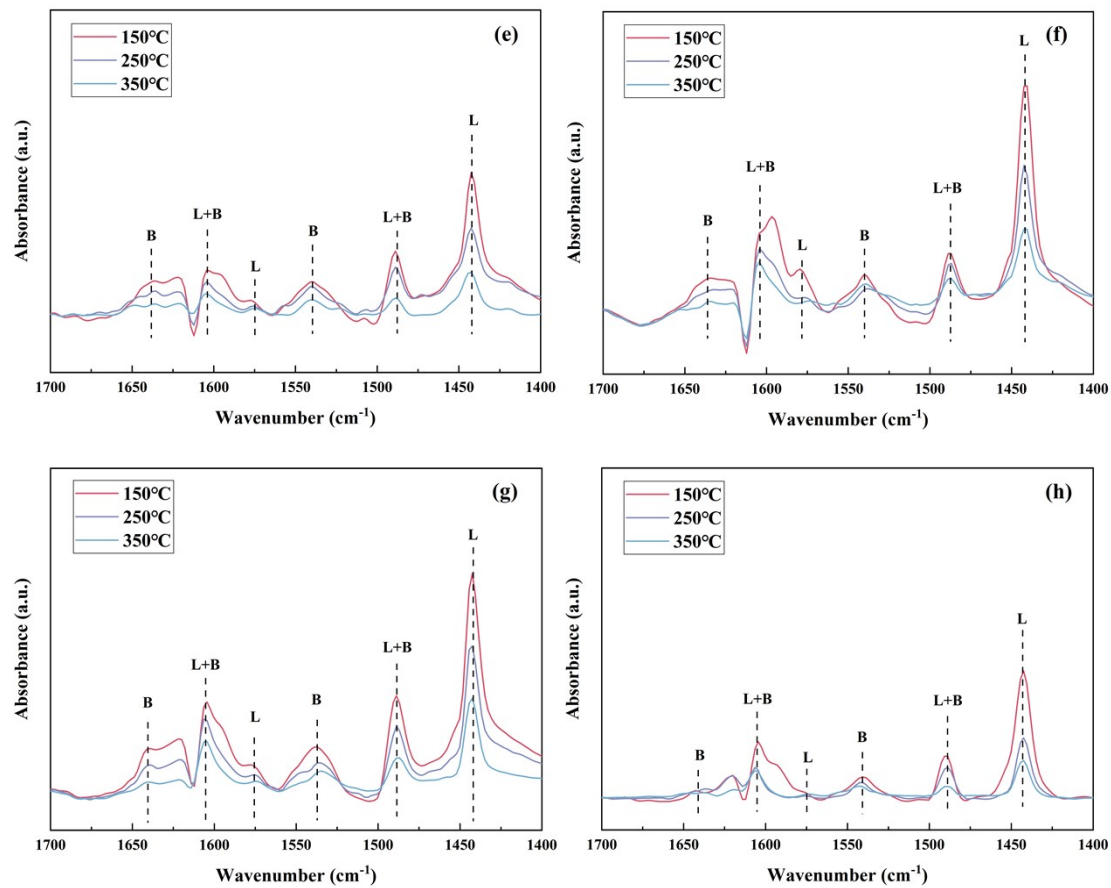

**Fig. S4.** Py-FTIR spectra of catalysts. (a) SZrO<sub>2</sub>; (b) SZr@ZrO<sub>2</sub>-2; (c) SZrO<sub>2</sub>@Zr-2; (d) SZr; (e) SZr@Zr-1; (f) SZr@Zr-2; (g) SZr@Zr-3; (h) SZr@Zr-5.

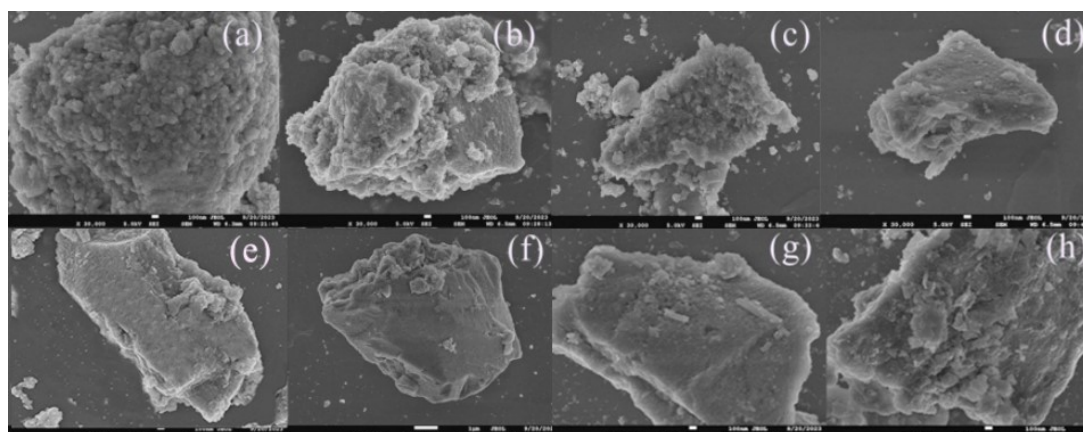

**Fig. S5.** SEM images of catalysts. (a) SZrO<sub>2</sub>; (b) SZr@ZrO<sub>2</sub>-2; (c) SZrO<sub>2</sub>@Zr-2; (d) SZr; (e) SZr@Zr-1; (f) SZr@Zr-2; (g) SZr@Zr-3; (h) SZr@Zr-5.

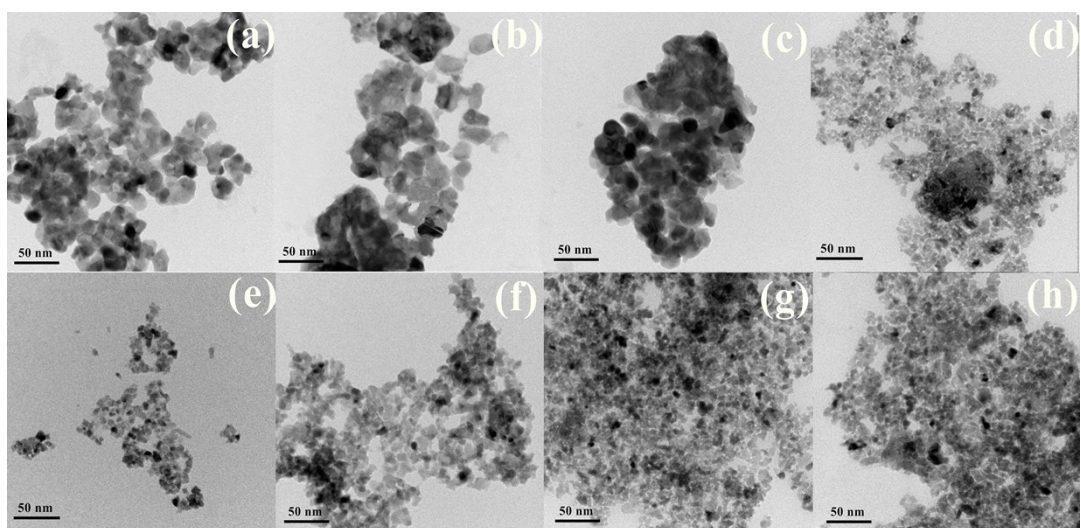

**Fig. S6.** TEM images of catalysts. (a)  $\text{SZrO}_2$ ; (b)  $\text{SZr@ZrO}_2\text{-2}$ ; (c)  $\text{SZrO}_2\text{@Zr-2}$ ; (d)  $\text{SZr}$ ; (e)  $\text{SZr@Zr-1}$ ; (f)  $\text{SZr@Zr-2}$ ; (g)  $\text{SZr@Zr-3}$ ; (h)  $\text{SZr@Zr-5}$ .
